# Supplementary material for: Building builders: entrepreneurship education from an ecosystem perspective at MIT
Source: Springer Nature journal article supplement (doi:10.1186/s40604-018-0051-y), 2018-06-01
Supplement: MOESM1 [file 15813930]

## Multilingual abstracts

### Arabic

#### Building builders: entrepreneurship education from an ecosystem perspective at MIT

Artur Tavares Vilas Boas Ribeiro, Juliana Natsumi Uechi, Guilherme Ary Plonski

#### Abstract

This study is about new possibilities on entrepreneurship education. With the emergence of the Entrepreneurial Universities, academics and university managers started to pay more attention to fostering entrepreneurship among students. However, entrepreneurship education research became more oriented towards teacher activities and neglected the entrepreneurship ecosystem around the university and its role in educating an entrepreneur. This article aims to present new possibilities for entrepreneurship education from this ecosystem perspective. The method was a Case Study of Massachusetts Institute of Technology and the results show educational practices that go beyond the classical model of classrooms, involving student-led activities, mentorship programs, competitions and others. Project-based courses, experience-based, and active-based activities are well covered in the data presented. In the discussions, we also present a model of organizing entrepreneurship education efforts and compare our results with other research on Swedish entrepreneurial universities. The conclusion reinforces the need to see entrepreneurship education through the lens of ecosystems, highlighting opportunities for future studies.

**Keywords:** entrepreneurial universities; university; entrepreneurship; entrepreneurial ecosystems; entrepreneurship education; education; innovation; entrepreneurial culture; spin-offs; venture creation; MIT; Massachusetts Institute of Technology.

#### بناء القدرات :تعليم المقاولات اعتمادا على رؤية النظم الايكولوجية لمعهد ماساتشوستس للتكنولوجيا

تقدم هذه الدراسة طرق ومناهج تعليمية جديدة. دفع ظهور الجامعات المقولة الأكاديميين ورؤساء الجامعات إلى مزيد الاهتمام بروح المبادرة لدى الطلبة وتعزيزها. إلا أن الأبحاث في مجال المقاولات طغت عليها الصيغة التعليمية والبيداغوجية على حساب الاهتمام بالمنظومة الايكولوجية للأعمال المحيطة بالجامعة ودور هذه الأبحاث في توعية رجال الأعمال. يهدف هذا المقال إلى طرح نماذج تعليمية جديدة لهذا النظام الايكولوجي. يعتمد هذا البحث على دراسة حالة معهد ماساتشوستس للتكنولوجيا حيث تظهر النتائج استعمال طرق تعليمية جديدة تتجاوز النموذج الكلاسيكي للتدريس والتي تهدف بالأساس إلى مزيد تشريك الطلبة والى تنمية روح التنافس فيهم. تغطي قاعدة البيانات المعتمدة بطريقة جيدة الدورات التكوينية القائمة على المشاريع وعلى أساس التجربة. يقترح هذا البحث في النقاش نموذج لتنظيم أنشطة التدريس في مجال المقاولات ويقارن النتائج المتحصل عليها مع نتائج أخرى توصلت إليها جامعات مقاولات سويدية. يؤكد هذا البحث على ضرورة تعليم المقاولات انطلاقا من مفهوم النظم الايكولوجية.

**الكلمات المفتاح :** الجامعات المقولة الجامعة ; المقاولات ; النظم الايكولوجية; تعليم المقاولات ; التعليم ; الابتكار ; ثقافة بعث المشاريع ; بعث المشاريع ; معهد ماساتشوستس للتكنولوجيا
